# Supplementary material for: A superelastic and ultralight graphene aerogel with a hydrophobic honeycombed structure for efficient absorption of hazardous organics
Source: Royal Society of Chemistry journal article supplement (doi:10.1039/d4ce01069h), 2024-12-03
Supplement: d4ce01069h1.pdf [file d4ce01069h1.pdf]

## Supplementary Materials

*for*

### **A superelastic and ultralight graphene aerogel with a hydrophobic honeycombed structure for efficient absorption of hazardous organics**

Qiaomu Zhang, Lehao Liu\*, Junfeng Ma, Haomiao Yang, Zhuoheng Wu, Chenhui Song, and Jinkui Zhang

*School of New Energy, North China Electric Power University, Beijing 102206, P. R.*

*China*

\* Corresponding author. E-mail: lehaoliu@ncepu.edu.cn

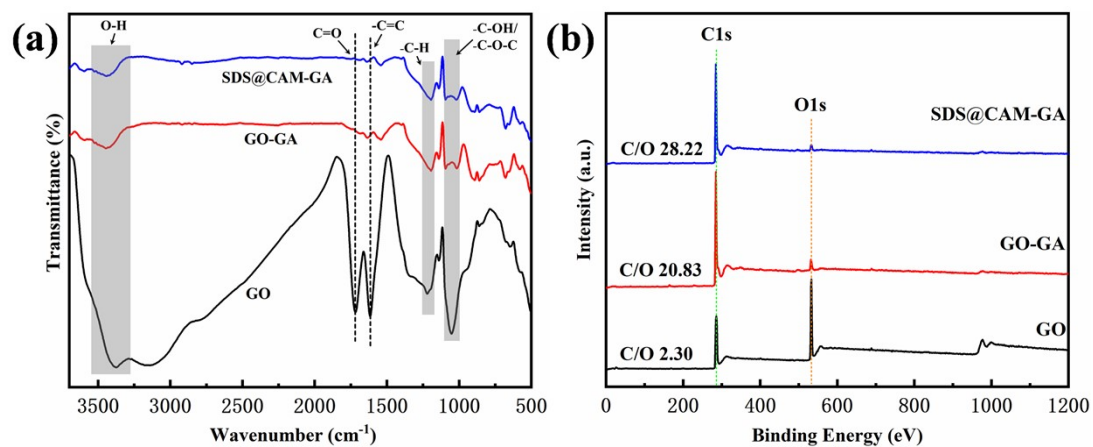

**Fig. S1 (a)** FTIR spectra of GO, GO-GA, and SDS@CAM-GA; **(b)** XPS spectra of C1s and O1s of GO, GO-GA and SDS@CAM-GA.

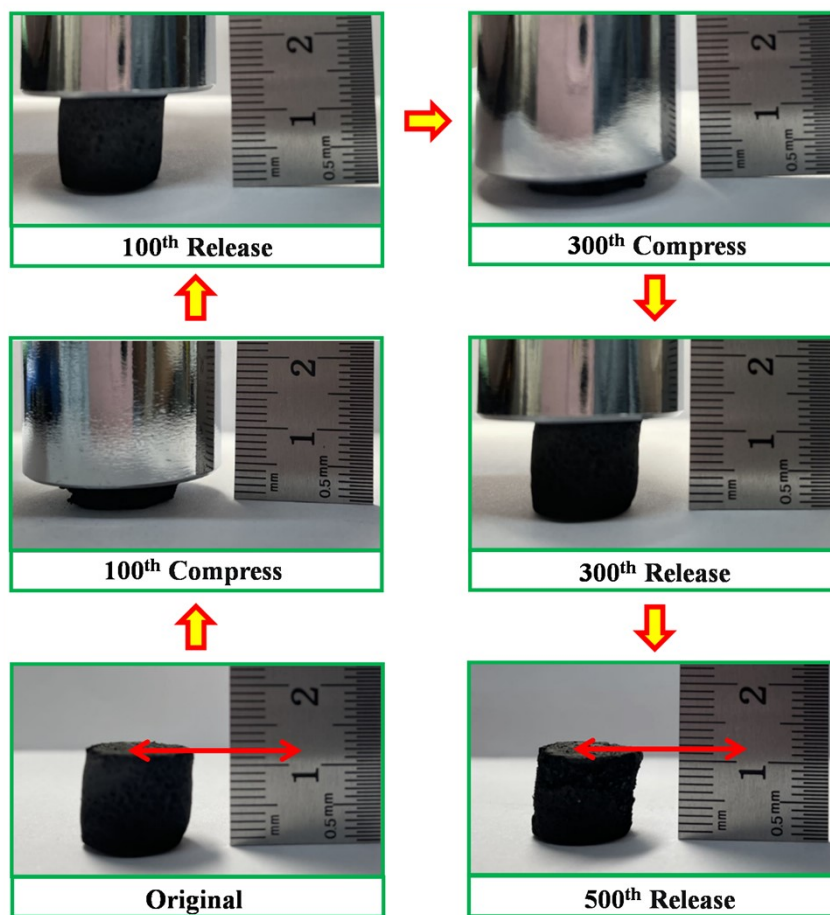

**Fig. S2** Snapshots of SDS@CAM-GA during 500 compression-recovery cycles with a 70% maximum strain.

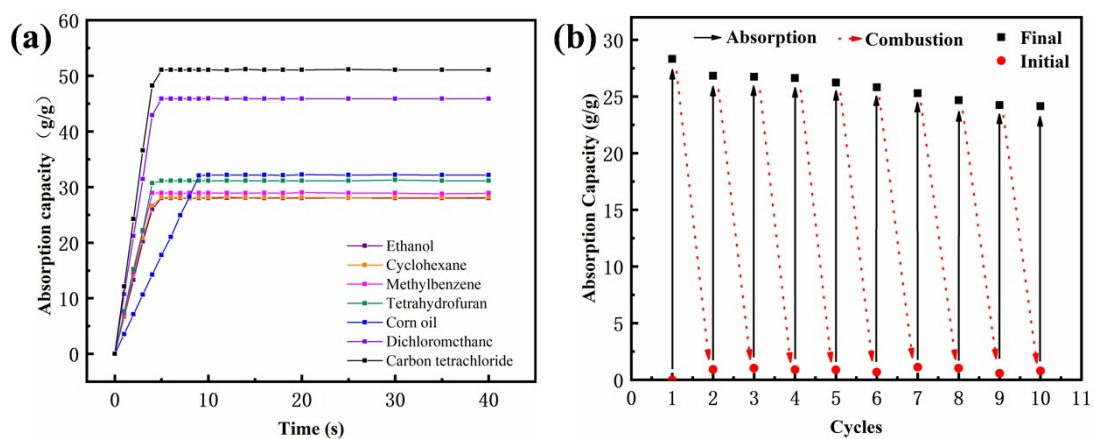

**Fig. S3 (a)** Absorption capacity of GO-GA for different organics over time; **(b)**

Absorption-combustion process and circulating absorption of ethanol by GO-GA.

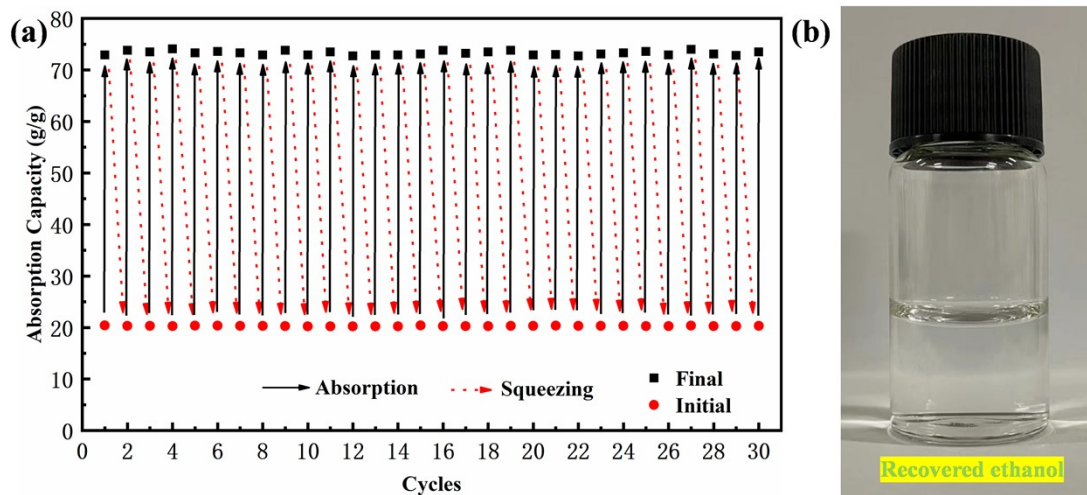

**Fig. S4 (a)** 30 absorption-extrusion recycling of ethanol by SDS@CAM-GA; **(b)**

Photograph of recovered ethanol in a glass bottle.
